# Supplementary material for: High-Density Patterned Array Bonding through Void-Free Divinyl Siloxane Bis-Benzocyclobutene Bonding Process
Source: MDPI journal article supplement (doi:10.3390/polym13213633), 2021-10-21
Supplement: s1 [file s1]

# Supporting Information

## High-Density Patterned Array Bonding Through Void-Free Divinyl Siloxane Bis-Benzocyclobutene Bonding Process

Nam Woon Kim<sup>1</sup>, Hyeonjeong Choe<sup>2</sup>, Muhammad Ali Shah<sup>1</sup>, Duck-Gyu Lee<sup>1,\*</sup> and Shin Hur<sup>1,3,\*</sup>

<sup>1</sup> Department of Nature-Inspired System and Application, Korea Institute of Machinery and Materials, Daejeon 34103, Republic of Korea

<sup>2</sup> Department of Drug Discovery, Korea Research Institute of Chemical Technology, Daejeon 34114, Republic of Korea

<sup>3</sup> Department of Nano-Mechatronics, University of Science and Technology, Daejeon 34113, Republic of Korea

\* Corresponding author. E-mail: educk9@kimm.re.kr, shur@kimm.re.kr

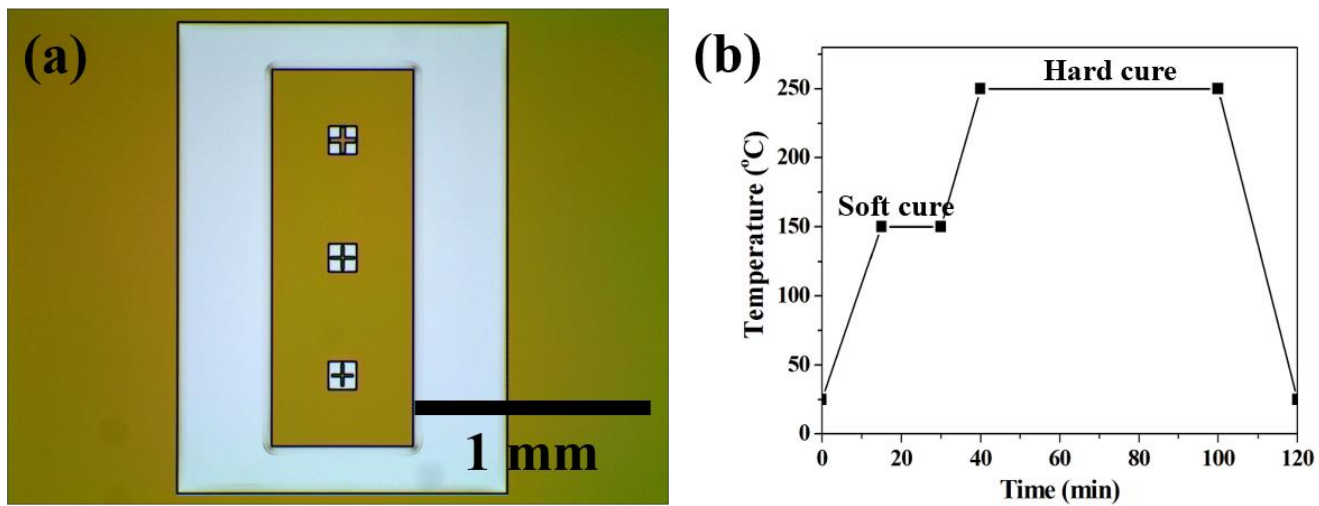

**Figure S1.** (a) DVS-BCB pattern alignment key and (b) temperature curing process for DVS-BCB bonding.

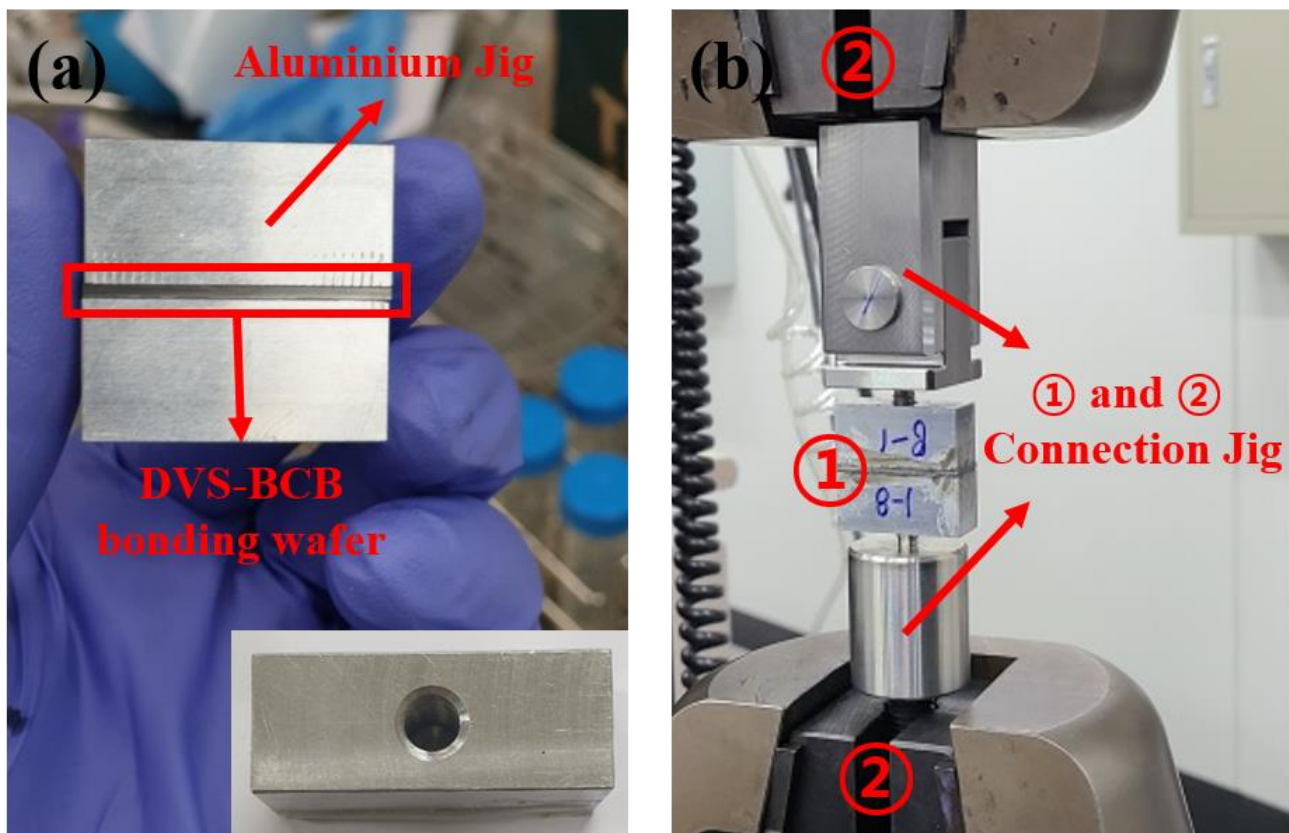

**Figure S2.** Experimental setup for the measurement of DVS-BCB bonding adhesion. (a) DVS-BCB-bonded wafer and aluminum jig connected using AXIA EP-04 epoxy. (b) DVS-BCB-bonding-wafer-aluminum-jig connected to universal testing machine using stainless steel connection jig.

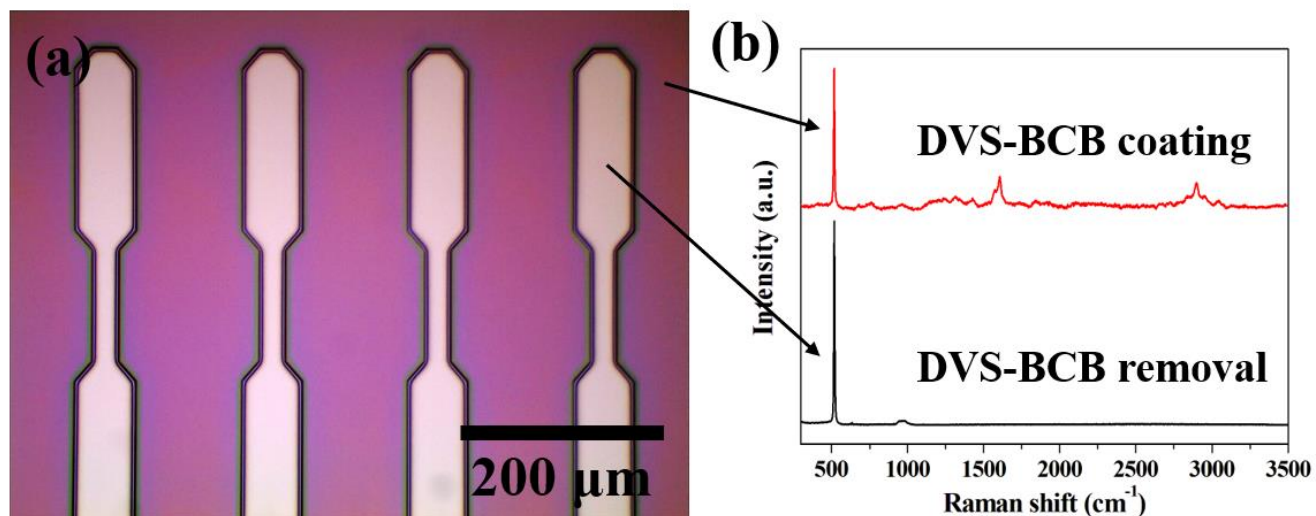

**Figure S3.** Raman spectra of the develop process results for the DVS-BCB patterns. (a) DVS-BCB pattern array microscopy image of the Raman measurement position. (b) Raman spectra with and without the DVS-BCB layer.

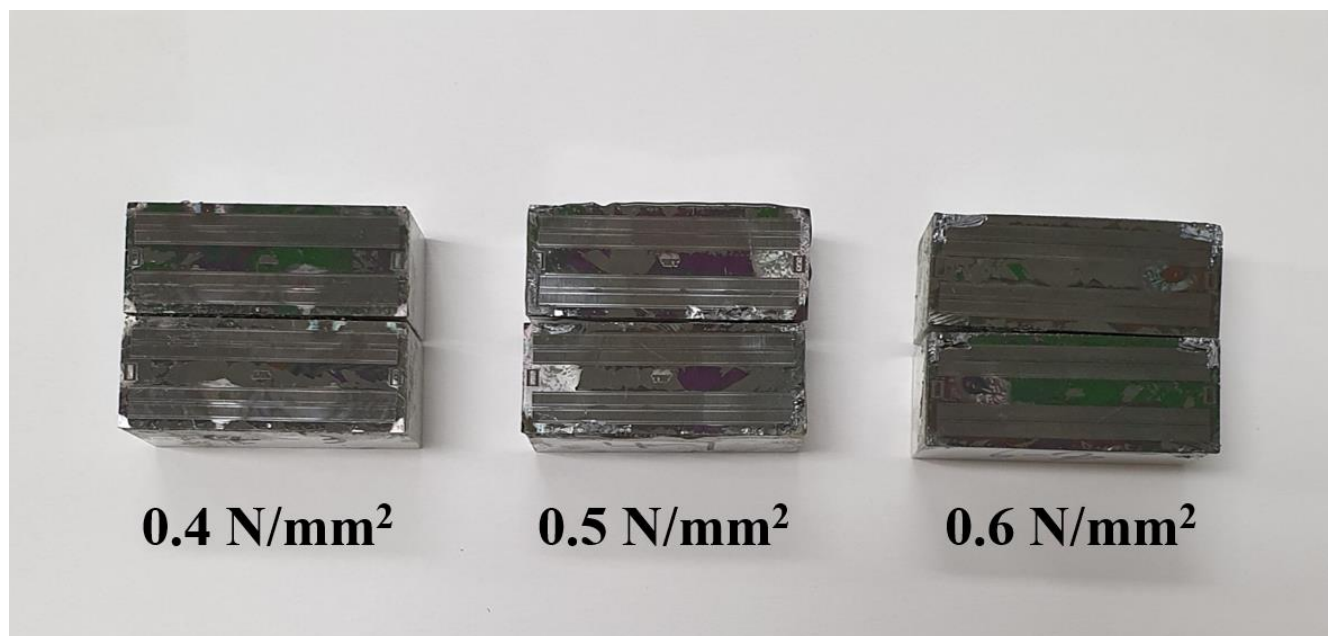

**Figure S4.** Optical images of samples detached after adhesion testing of DVS-BCB bonding.

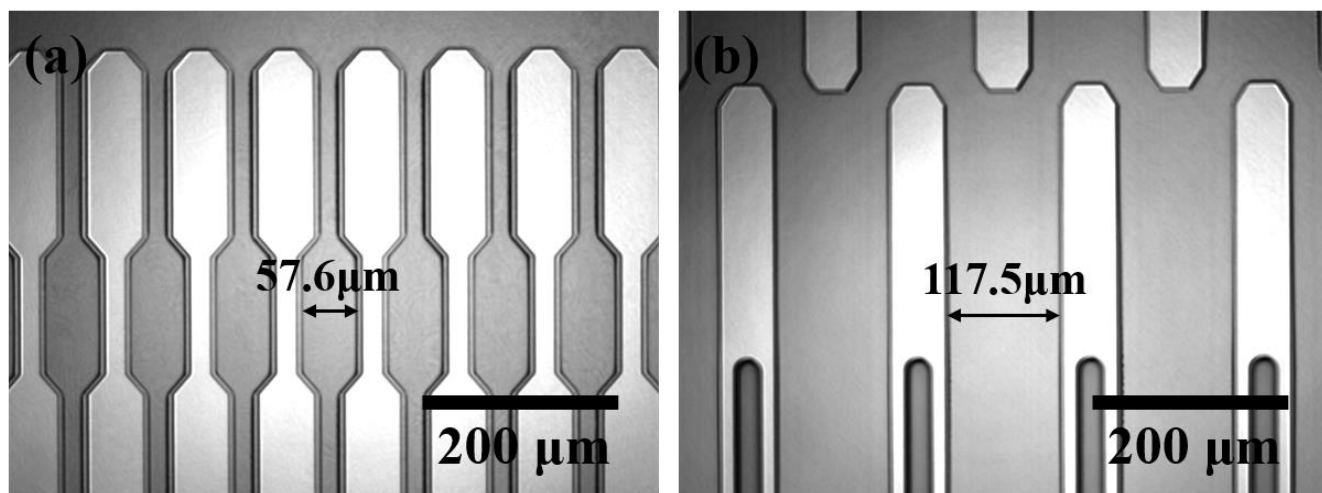

**Figure S5.** Near-infrared confocal laser microscopic images of the DVS-BCB bonding layer fabricated with a compressive pressure of 0.6 N/mm<sup>2</sup>. (a) Super high-density patterns and (b) linear patterns.
